# Supplementary material
Source: publisher site journal article supplement (https://www.dovepress.com/article/448165)
Supplement: Supplementary file 1 [file get_supplementary_file.php]

| Normal chow diet | | HFD | |
| --- | --- | --- | --- |
| Ingredients | Percent(%) | Ingredients | Percent(%) |
| casein | 19.0 | casein | 25.8 |
| L-cystine | 0.2 | L-cystine | 0.4 |
| corn starch | 47.9 | sucrose | 9 |
| maltodextrin | 11.8 | maltodextrin | 16.3 |
| sucrose | 6. 5 | cellulose | 6.5 |
| cellulose | 4.7 | soybean oil | 3.4 |
| soybean oil | 2.4 | lard | 31.7 |
| lard | 1.9 | mineral mix | 1.6 |
| mineral mix | 0.95 | dicalcium phosphate | 1.4 |
| dicalcium phosphate | 1.2 | calcium carbonate | 0.8 |
| calcium carbonate | 0.5 | potassium citrate | 2.3 |
| potassium citrate | 1.6 | vitamin blend | 1.3 |
| vitamin mix | 0.95 | choline bitartrate | 0.3 |
| choline bitartrate | 0.2 |  |  |

**Table S1** Formulation
